# Supplementary material
Source: MDPI journal article supplement (https://www.mdpi.com/2311-7524/10/1/42)
Supplement: s1 [file s1]

1 Table S1. Primers used in this study.

| FUNCTION                | TARGET GENE | GENE DEFINITION       | PRIMER SET            | PRIMER SEQUENCE (5' – 3')                       | ANNEALING TEMPERATURE (°C) | AMPLICON SIZE (BP) | REFERENCE |
|-------------------------|-------------|-----------------------|-----------------------|-------------------------------------------------|----------------------------|--------------------|-----------|
| Nitrification           | <i>amoA</i> | ammonia monooxygenase | amoA1F                | GGGGTTTCTACTGGTGGT                              | 57                         | 491                | [75]      |
|                         |             |                       | amoA2R                | CCCCTCKGSAAAGCCTTCTTC                           |                            |                    |           |
| Denitrification         | <i>nirK</i> | nitrite reductase     | nirK876F<br>nirK1040R | ATYGGCGGVCA YGGCGA<br>GCCTCGATCAGRTRTGTT        | 58                         | 165                | [76]      |
| N <sub>2</sub> fixation | <i>nifH</i> | nitrogenase reductase | PolF                  | TGC GAY CCS AAR GCB GAC TC                      | 55                         | 362                | [46]      |
|                         |             |                       | PolR                  | ATSGCCATCATYTCRCCGGA                            |                            |                    |           |
| Carbon fixation         | <i>cbbL</i> | cbbL red-like gene    | cbbL-RedF             | AAGGAYGACGAGAACATC                              | 57                         | 820                | [77]      |
|                         |             |                       | cbbL-RedR             | TCGGTCGGSGTGTAGTTGAA                            |                            |                    |           |
| Carbon degradation      | <i>GH7</i>  | cellulose degradation | GH7-F<br>GH7-R        | GAGATCAAGCGCYTCTAYGTBCA<br>GTCRAGCCASAGCATGTTGG | 56                         | 242                | [78]      |

2

Table S2. *amoA* PCR cycling conditions.

| Step                 | # of cycles | Temperature | Time   |
|----------------------|-------------|-------------|--------|
| Initial denaturation | 1           | 95°C        | 10 min |
| Denaturation         | 40          | 95°C        | 15 sec |
| Annealing            |             | 58°C        | 30 sec |
| Extension            |             | 72°C        | 45 sec |

Table S3. *nirK* PCR cycling conditions.

| Step         | # of cycles | Temperature | Time   |
|--------------|-------------|-------------|--------|
| Denaturation | 1           | 95°C        | 10 min |
| Denaturation | 40          | 95°C        | 25 sec |
| Annealing    |             | 60°C        | 30 sec |
| Extension    |             | 72°C        | 30 sec |

Table S4. *cbbL* PCR cycling conditions.

| Step         | # of cycles | Temperature | Time   |
|--------------|-------------|-------------|--------|
| Denaturation | 1           | 95°C        | 10 min |
| Denaturation | 40          | 95°C        | 1 min  |
| Annealing    |             | 57°C        | 2 min  |
| Extension    |             | 72°C        | 2 min  |

Table S5. *GH7* PCR cycling conditions.

| Step         | # of cycles | Temperature | Time   |
|--------------|-------------|-------------|--------|
| Denaturation | 1           | 95°C        | 10 min |
| Denaturation | 40          | 95°C        | 30 sec |
| Annealing    |             | 56°C        | 30 sec |
| Extension    |             | 72°C        | 30 sec |

Table S6. *nifH* PCR cycling conditions.

| Step         | # of cycles | Temperature | Time   |
|--------------|-------------|-------------|--------|
| Denaturation | 1           | 95°C        | 5 min  |
| Denaturation | 40          | 95°C        | 30 sec |
| Annealing    |             | 55°C        | 30 sec |
| Extension    |             | 72°C        | 30 sec |

Table S7. Pearson correlation results of the properties analyzed.

\* P-value < 0.05; \*\* P-value < 0.01.

Table S8. Main soil characteristics. Values are mean  $\pm$  standard error (n = 4).

|                                   |                       | BA+FU            | BA               | F50              | F100             | ANOVA |
|-----------------------------------|-----------------------|------------------|------------------|------------------|------------------|-------|
| <b>pH</b>                         |                       | 9,03 $\pm$ 0,02  | 9,00 $\pm$ 0,04  | 9,02 $\pm$ 0,04  | 9,02 $\pm$ 0,02  | ns    |
| <b>Total organic C</b>            | g kg <sup>-1</sup>    | 10,6 $\pm$ 0,3   | 10,96 $\pm$ 0,49 | 10,52 $\pm$ 0,46 | 10,17 $\pm$ 1,62 | ns    |
| <b>Total N</b>                    | g kg <sup>-2</sup>    | 1,00 $\pm$ 0,05  | 1,07 $\pm$ 0,03  | 1,02 $\pm$ 0,04  | 0,99 $\pm$ 0,00  | ns    |
| <b>Cation exchange capacity</b>   | cmol kg <sup>-1</sup> | 14,9 $\pm$ 0,40  | 15,07 $\pm$ 0,43 | 14,95 $\pm$ 0,41 | 14,99 $\pm$ 0,33 | ns    |
| <b>Exchangeable Ca</b>            | cmol kg <sup>-1</sup> | 10,3 $\pm$ 0,30  | 10,19 $\pm$ 0,27 | 10,09 $\pm$ 0,24 | 10,25 $\pm$ 0,28 | ns    |
| <b>Exchangeable Mg</b>            | cmol kg <sup>-1</sup> | 2,44 $\pm$ 0,05  | 2,41 $\pm$ 0,06  | 2,39 $\pm$ 0,06  | 2,41 $\pm$ 0,06  | ns    |
| <b>Exchangeable K</b>             | cmol kg <sup>-1</sup> | 1,45 $\pm$ 0,05  | 1,75 $\pm$ 0,15  | 1,79 $\pm$ 0,15  | 1,58 $\pm$ 0,06  | ns    |
| <b>Exchangeable Na</b>            | cmol kg <sup>-1</sup> | 0,71 $\pm$ 0,00  | 0,72 $\pm$ 0,05  | 0,68 $\pm$ 0,02  | 0,75 $\pm$ 0,03  | ns    |
| <b>Sum of bases</b>               | cmol kg <sup>-1</sup> | 14,9 $\pm$ 0,40  | 15,07 $\pm$ 0,43 | 14,95 $\pm$ 0,41 | 14,99 $\pm$ 0,33 | ns    |
| <b>Carbonate content</b>          | %                     | 28,10 $\pm$ 1,49 | 26,53 $\pm$ 1,63 | 27,23 $\pm$ 2,80 | 30,98 $\pm$ 6,30 | ns    |
| <b>NH<sub>4</sub><sup>+</sup></b> | mg kg <sup>-1</sup>   | 1,39 $\pm$ 0,08  | 1,66 $\pm$ 0,09  | 1,44 $\pm$ 0,03  | 1,72 $\pm$ 0,44  | ns    |
| <b>NO<sub>3</sub><sup>-</sup></b> | mg kg <sup>-1</sup>   | 13,28 $\pm$ 4,08 | 13,79 $\pm$ 1,62 | 11,07 $\pm$ 6,61 | 12,93 $\pm$ 6,02 | ns    |
| <b>P available</b>                | mg kg <sup>-1</sup>   | 60,65 $\pm$ 4,58 | 60,75 $\pm$ 1,38 | 57,5 $\pm$ 2,83  | 51,88 $\pm$ 4,34 | ns    |
| <b>Fe bioavailable</b>            | mg kg <sup>-1</sup>   | 2,23 $\pm$ 0,19  | 2,1 $\pm$ 0,09   | 2,13 $\pm$ 0,13  | 2,22 $\pm$ 0,07  | ns    |
| <b>Cu bioavailable</b>            | mg kg <sup>-1</sup>   | 1,75 $\pm$ 0,17  | 1,76 $\pm$ 0,10  | 1,74 $\pm$ 0,11  | 1,58 $\pm$ 0,07  | ns    |
| <b>Zn bioavailable</b>            | mg kg <sup>-1</sup>   | 5,68 $\pm$ 0,56  | 5,74 $\pm$ 0,36  | 5,81 $\pm$ 0,30  | 5,01 $\pm$ 0,14  | ns    |
| <b>Mn bioavailable</b>            | mg kg <sup>-1</sup>   | 7,97 $\pm$ 0,17  | 7,72 $\pm$ 0,21  | 7,73 $\pm$ 0,49  | 8,42 $\pm$ 0,13  | ns    |
| <b>Mo bioavailable</b>            | mg kg <sup>-1</sup>   | 7,13 $\pm$ 3,21  | 2,63 $\pm$ 1,46  | 8,67 $\pm$ 3,53  | 11,18 $\pm$ 2,50 | ns    |
| <b>B bioavailable</b>             | mg kg <sup>-1</sup>   | 7,59 $\pm$ 0,08  | 7,7 $\pm$ 0,18   | 7,73 $\pm$ 0,24  | 7,78 $\pm$ 0,10  | ns    |

BA+FU (F50 + the application of a formulation of bacteria and non-mycorrhizal fungi), BA (F50 + the application of a formulation of nitrogen-fixing and phosphorus and potassium solubilizing bacteria), F50 (50% of the rate of inorganic fertilizers added in F100), F100 (inorganic fertilizers applied at the rate to cover the nutritional demands of the crop). ns: not significant ( $p = 0.05$ ).

## References

- Henry, S., Baudoin, E., López-Gutiérrez, J.C., Martin-Laurent, F., Brauman, A., Philippot, L., 2004. Quantification of denitrifying bacteria in soils by nirK gene targeted real-time PCR. *J. Microbiol. Methods* 59, 327–335. <https://doi.org/10.1016/j.mimet.2004.07.002>
- Poly, F.; Ranjard, L.; Nazaret, S.; Gourbière, F.; Monrozier, L.J. Comparison of nifH Gene Pools in Soils and Soil Microenvironments with Contrasting Properties. *Appl. Environ. Microbiol.* 2001, 67, 2255–2262. <https://doi.org/10.1128/AEM.67.5.2255-2262.2001>.
- Rotthauwe, J.H., Witzel, K.P., Liesack, W., 1997. The ammonia monooxygenase structural gene amoA as a functional marker: molecular fine-scale analysis of natural ammonia-oxidizing populations. *Appl. Environ. Microbiol.* 63, 4704–4712. <https://doi.org/10.1128/aem.63.12.4704-4712.1997>
- Selesi, D., Schmid, M., Hartmann, A., 2005. Diversity of Green-Like and Red-Like Ribulose-1,5-Bisphosphate Carboxylase/Oxygenase Large-Subunit Genes (cbbL) in Differently Managed Agricultural Soils. *Appl. Environ. Microbiol.* 71, 175–184. <https://doi.org/10.1128/AEM.71.1.175-184.2005>
- Tian, X., Yang, T., He, J., Chu, Q., Jia, X., Huang, J., 2017. Fungal community and cellulose-degrading genes in the composting process of Chinese medicinal herbal residues. *Bioresour. Technol.* 241, 374–383. <https://doi.org/10.1016/j.biortech.2017.05.116>
